# Supplementary material
Source: PubMed Central journal article supplement (PMC6818163)
Supplement: mmc1.pdf [file mmc1.pdf]

**Biophysical Journal, Volume 117**

**Supplemental Information**

**Quantitative Studies of an RNA Duplex Electrostatics by Ion Counting**

**Magdalena Gebala and Daniel Herschlag**

## Quantitative studies of an RNA duplex electrostatics by ion counting

Magdalena Gebala<sup>1</sup>, Daniel Herschlag<sup>1,2,3,\*</sup>

<sup>1</sup> Department of Biochemistry, Stanford University, Stanford, CA, 94305 USA

<sup>2</sup> Department of Chemistry, Stanford University, Stanford, CA, 94305 USA

<sup>3</sup> ChEM-H Institute, Stanford University, Stanford, CA, 94305 USA

### Overview of the Supplementary Information

In this supplementary information, we provide a table with preferential ion interaction coefficients  $\Gamma_i$  (e.g. the number of associated ions,  $i = \text{Na}^+$  or  $\text{Br}^-$ ), around 24-bp RNA, 24-bp and 23-bp DNA (Table S1) for NaBr; a table summarizing the fraction of charge neutralization from attraction of  $\text{Na}^+$  measured by ASAX and BE-ICP-MS around dsRNA and dsDNA (Table S2); a table with preferential ion interaction coefficients from competition experiments between  $\text{Na}^+:\text{Mg}^{2+}$  and  $\text{Cs}^+:\text{Mg}^{2+}$  around 24-bp RNA. The results are consistent with observations in the main text and support the conclusions described therein.

**Table S1:** Experimentally determined preferential interaction coefficients ( $\Gamma_i$ ) for NaBr around 24-bp RNA, 24-bp DNA, and 23-bp DNA

| C<br>[M] | 24 bp RNA              |                        |            | 24 bp DNA              |                        |            | 23 bp DNA              |                        |            |
|----------|------------------------|------------------------|------------|------------------------|------------------------|------------|------------------------|------------------------|------------|
|          | $\Gamma_{\text{Na}^+}$ | $\Gamma_{\text{Br}^-}$ | total      | $\Gamma_{\text{Na}^+}$ | $\Gamma_{\text{Br}^-}$ | total      | $\Gamma_{\text{Na}^+}$ | $\Gamma_{\text{Br}^-}$ | total      |
| 0.01     | 39 ± 1.0               | -6.0 ± 0.7             | 45.0 ± 1.2 | 37.0 ± 1.0             | -9.0 ± 0.5             | 46.0 ± 1.0 | 36.0 ± 0.2             | -8.0 ± 0.3             | 44.0 ± 0.3 |
| 0.02     | 39.5 ± 0.5             | -6.5 ± 1.0             | 46.0 ± 1.0 | 37.0 ± 0.2             | -8.75 ± 0.2            | 46.0 ± 0.3 | 35.0 ± 0.3             | -8.6 ± 0.2             | 44.0 ± 0.3 |
| 0.10     | 37.0 ± 1.0             | -8.0 ± 1.2             | 45.0 ± 1.6 | 34.0 ± 1.0             | -11.5 ± 1.0            | 45.5 ± 1.4 | 32.0 ± 1.0             | -12.0 ± 1.0            | 44.0 ± 1.0 |
| 0.12     | 36.0 ± 1.0             | -10.0 ± 1.5            | 46.0 ± 1.8 | -                      | -                      | -          | -                      | -                      | -          |
| 0.26     | -                      | -                      | -          | -                      | -                      | -          | 27.0 ± 1.5             | -17.5 ± 1.0            | 44.5 ± 1.8 |
| 0.50     | 31.0 ± 1.5             | -13 ± 2.0              | 44.0 ± 2.5 | 24.6 ± 1.0             | -21.5 ± 1.5            | 46.0 ± 1.8 | -                      | -                      | -          |
| 0.65     | -                      | -                      | -          | -                      | -                      | -          | 18.0 ± 0.5             | -26 ± 0.5              | 44.0 ± 0.5 |

**Table S2.** Interaction coefficients for NaBr around 24-bp DNA obtained previously in reference (3)

| C<br>[M] | NaBr            |                 |                |
|----------|-----------------|-----------------|----------------|
|          | $\Gamma_{Na^+}$ | $\Gamma_{Br^-}$ | total          |
| 0.010    | $37.0 \pm 0.9$  | $-9.0 \pm 0.9$  | $46 \pm 1.3$   |
| 0.050    | $36.0 \pm 0.7$  | $-8.7 \pm 0.7$  | $44.7 \pm 1.0$ |
| 0.100    | $35.0 \pm 1.0$  | $-10 \pm 1.0$   | $45 \pm 1.4$   |
| 0.200    | $32.0 \pm 1.5$  | $-14.5 \pm 1.5$ | $46.5 \pm 2.0$ |
| 0.350    | $28.0 \pm 1.5$  | $-16.7 \pm 1.2$ | $44.7 \pm 2.0$ |
| 0.500    | $24.6 \pm 1.0$  | $-21.5 \pm 1.5$ | $46.1 \pm 1.8$ |

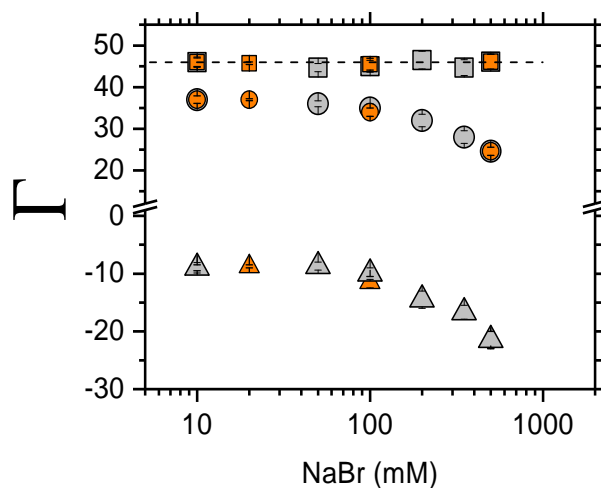

**Figure S1.** Comparison of current (orange symbols) and previous (grey symbols) ion counting results for association of NaBr around 24-bp DNA from BE-ICP-MS measurements. Data point in grey are from reference (3) and values are given in Table S2.

**Table S3:** Experimentally determined fraction of charge neutralization ( $\Gamma_{Na}^*$ ) for  $Na^+$  around dsRNA and dsDNA at 100 mM monovalent salt concentration.

| C<br>[M] | dsRNA                          |                           | ds DNA                         |                           |
|----------|--------------------------------|---------------------------|--------------------------------|---------------------------|
|          | $\Gamma_{Na}^{*ASAXS}$         | $\Gamma_{Na}^{*BE-ICPMS}$ | $\Gamma_{Na}^{*ASAXS}$         | $\Gamma_{Na}^{*BE-ICPMS}$ |
| 0.1      | $0.73 \pm 0.06$ <sup>(a)</sup> | $0.80 \pm 0.02$           | $0.71 \pm 0.06$ <sup>(b)</sup> | $0.74 \pm 0.02$           |

a) Data taken from reference 1

b) Data taken from reference 2

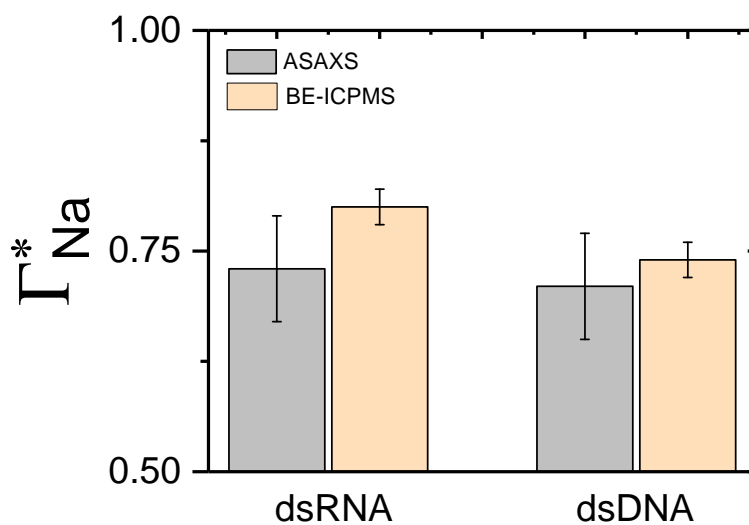

**Figure S2.** Comparison of experimentally determined fraction of charge neutralization ( $\Gamma_{Na}^*$ ) for  $Na^+$  around dsRNA and dsDNA from ASAXS and BE-ICP-MS. Data from Table S2.

**Table S4:** Experimentally determined preferential interaction coefficients and  $\alpha$  value for **NaBr** and **CsBr** around 24-bp RNA in the presence of 6 mM  $MgBr_2$ .

| NaBr                           |                 | 24-bp RNA          |                 |            |                                | CsBr            | 24-bp RNA          |                 |            |  |
|--------------------------------|-----------------|--------------------|-----------------|------------|--------------------------------|-----------------|--------------------|-----------------|------------|--|
| C [M]                          | $\Gamma_{Na^+}$ | $\Gamma_{Mg^{2+}}$ | $\Gamma_{Br^-}$ | total      | C [M]                          | $\Gamma_{Cs^+}$ | $\Gamma_{Mg^{2+}}$ | $\Gamma_{Br^-}$ | total      |  |
| 0.00                           | 0               | 21.0 ± 0.5         | -3.0 ± 1.0      | 46.0 ± 1.0 | 0                              | 0               | 21.0 ± 0.5         | -4.0            | 46.0 ± 0.7 |  |
| 0.0015                         | 0.6 ± 0.5       | 22.0 ± 0.5         | -2.0 ± 0.5      | 46.8 ± 0.8 | 0.02                           | 3.6 ± 1.0       | 19.0 ± 0.5         | -5.4 ± 1.0      | 47.0 ± 1.5 |  |
| 0.01                           | 2.9 ± 0.8       | 20.0 ± 0.4         | -3.0 ± 1.6      | 45.6 ± 1.4 | 0.03                           | 8.0 ± 1.0       | 16.0 ± 0.3         | -5.0 ± 0.6      | 45.6 ± 1.2 |  |
| 0.02                           | 3.9 ± 0.6       | 18.5 ± 0.4         | -5.4 ± 1.4      | 46.5 ± 1.6 | 0.06                           | 10.0 ± 0.5      | 16.0 ± 0.6         | -4.0 ± 1.0      | 46.0 ± 1.2 |  |
| 0.03                           | 6.5 ± 1.0       | 17.4 ± 0.4         | -4.7 ± 1.8      | 46.0 ± 2.0 | 0.10                           | 11.5 ± 1.0      | 13.5 ± 0.8         | -7.0 ± 1.0      | 45.6 ± 1.6 |  |
| 0.05                           | 9.3 ± 2.0       | 15.5 ± 1.4         | -6.0 ± 1.2      | 46.3 ± 2.7 | 0.2                            | 19.0 ± 0.9      | 8.1 ± 1.4          | -10.0 ± 1.0     | 45.0 ± 1.7 |  |
| 0.08                           | 10.0 ± 1.0      | 13.5 ± 1.0         | -9.0 ± 1.0      | 46.0 ± 1.7 | -                              | -               | -                  | -               | -          |  |
| 0.11                           | 12.5 ± 2.0      | 11.0 ± 1.3         | -11.0 ± 1.0     | 46.0 ± 2.7 | -                              | -               | -                  | -               | -          |  |
| 0.20                           | 19.8 ± 1.5      | 7.2 ± 0.4          | -13.3 ± 1.3     | 47.5 ± 2.0 | -                              | -               | -                  | -               | -          |  |
| $\alpha_{Na}^* = 17.0 \pm 1.7$ |                 |                    |                 |            | $\alpha_{Cs}^* = 18.3 \pm 2.5$ |                 |                    |                 |            |  |

\*Defined in the main text

**Table S5:** Poisson Boltzmann calculations of preferential interaction coefficients and  $\alpha$  value for monovalent salt (MX) around 24-bp DNA in the presence of 6 mM divalent salt (MX<sub>2</sub>).

| MX<br>C<br>[M] | 24-bp DNA              |                   |                |       |
|----------------|------------------------|-------------------|----------------|-------|
|                | $\Gamma_{M^+}$         | $\Gamma_{M^{2+}}$ | $\Gamma_{X^-}$ | total |
| 0.00           | 0                      | 21.14             | -3.7           | 46.0  |
| 0.005          | 2.5                    | 19.5              | -4.5           | 46.0  |
| 0.01           | 4.5                    | 18.2              | -5.1           | 46.0  |
| 0.02           | 7.53                   | 16.16             | -6.15          | 46.0  |
| 0.03           | 9.85                   | 14.6              | -6.95          | 46.0  |
| 0.04           | 11.73                  | 13.32             | -7.63          | 46.0  |
| 0.045          | 12.5                   | 12.8              | -7.95          | 46.0  |
| 0.05           | 13.23                  | 12.26             | -8.25          | 46.0  |
| 0.06           | 14.45                  | 11.36             | -8.83          | 46.0  |
| 0.08           | 16.45                  | 9.85              | -9.84          | 46.0  |
| 0.10           | 17.9                   | 8.73              | -10.7          | 46.0  |
| 0.15           | 20.0                   | 6.68              | -12.6          | 46.0  |
| 0.20           | 21.0                   | 5.37              | -14.26         | 46.0  |
| 0.30           | 21.27                  | 3.79              | -17.15         | 46.0  |
|                | $\alpha_{M^+}^* = 7.5$ |                   |                |       |

\*Defined in the main text

**Table S6:** Poisson Boltzmann calculations of preferential interaction coefficients and  $\alpha$  value for monovalent salt (MX) around 24-bp RNA in the presence of 6 mM divalent salt (MX<sub>2</sub>).

| MX<br>C<br>[M] | 24-bp RNA               |                   |                |       |
|----------------|-------------------------|-------------------|----------------|-------|
|                | $\Gamma_{M^+}$          | $\Gamma_{M^{2+}}$ | $\Gamma_{X^-}$ | total |
| 0.00           | 0                       | 21.45             | -3.1           | 46.0  |
| 0.001          | 0.44                    | 21.13             | -3.3           | 46.0  |
| 0.01           | 3.5                     | 19.1              | -4.3           | 46.0  |
| 0.02           | 5.86                    | 17.5              | -5.14          | 46.0  |
| 0.03           | 7.62                    | 16.32             | -5.74          | 46.0  |
| 0.04           | 9.0                     | 15.4              | -6.2           | 46.0  |
| 0.05           | 10.24                   | 14.5              | -6.76          | 46.0  |
| 0.08           | 12.84                   | 12.6              | -7.96          | 46.0  |
| 0.10           | 14.13                   | 11.62             | -8.64          | 46.0  |
| 0.20           | 17.9                    | 8.3               | -11.5          | 46.0  |
| 0.3            | 19.5                    | 6.3               | -13.9          | 46.0  |
| 0.5            | 19.72                   | 3.93              | -18.43         | 46.0  |
|                | $\alpha_{M^+}^* = 13.3$ |                   |                |       |

\*Defined in the main text

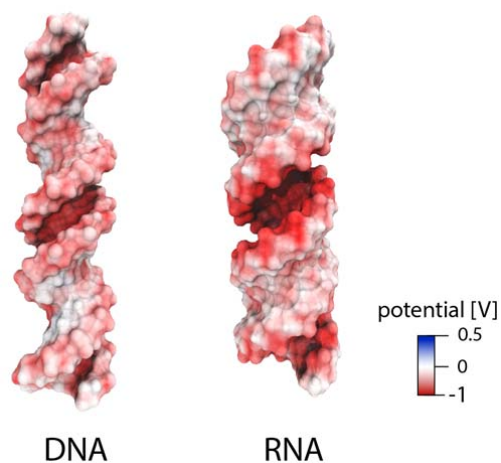

**Figure S3.** Poisson-Boltzmann calculations of electrostatic surface potential of the DNA and RNA duplexes. Calculations were carried out as described in the main text and Figure 3 in the main text.

#### REFERENCES:

1. Pabit, S. A., S. P. Meisburger, L. Li, J. M. Blose, C. D. Jones, and L. Pollack. 2010. Counting Ions around DNA with Anomalous Small-Angle X-ray Scattering. *J. Am. Chem. Soc.* 132(46):16334-16336.
2. Kirmizialtin, S., S. A. Pabit, S. P. Meisburger, L. Pollack, and R. Elber. 2012. RNA and Its Ionic Cloud: Solution Scattering Experiments and Atomically Detailed Simulations. *Biophys. J.* 102(4):819-828.
3. Gebala, M., G. M. Giambaşu, J. Lipfert, N. Bisaria, S. Bonilla, G. Li, D. M. York, and D. Herschlag. 2015. Cation-anion interactions within the nucleic acid ion atmosphere revealed by ion counting. *J. Am. Chem. Soc.* 137(46):14705-14715
